# Supplementary material for: N-(Guanidinoethyl)-2′-deoxy-5-methylisocytidine exhibits selective recognition of a CG interrupting site for the formation of anti-parallel triplexes
Source: Royal Society of Chemistry journal article supplement (doi:10.1039/c3ob40472b), 2013-01-01

Electronic Supplementary Information

## ***N*-(Guanidinoethyl)-2'-deoxy-5-methylisocytidine exhibits a selective recognition of a CG interrupting site for the formation of anti-parallel triplexes†**

Hidenori Okamura, Yosuke Taniguchi,\* and Shigeki Sasaki\*

### CONTENTS

|                                                                                                                                                     |      |
|-----------------------------------------------------------------------------------------------------------------------------------------------------|------|
| 1. HPLC chart of guanidineethyl-isodC in TFO (3'- <i>N</i> <sup>3</sup> Z <i>N</i> <sup>5</sup> -5'). Figure S1                                     | p2   |
| 2. MALDI-TOF Mass chart of guanidineethyl-isodC in TFO (3'- <i>N</i> <sup>3</sup> Z <i>N</i> <sup>5</sup> -5'). Figure S2                           | p3-4 |
| 3. MALDI-TOF Mass results of synthesized TFOs in this study. Table S1                                                                               | p5   |
| 4. <sup>1</sup> H, <sup>13</sup> C, <sup>31</sup> P-NMR spectra of compound <b>2a</b> , <b>2b</b> , <b>3a</b> , <b>3b</b> , <b>4</b> and <b>5</b> . | p6   |

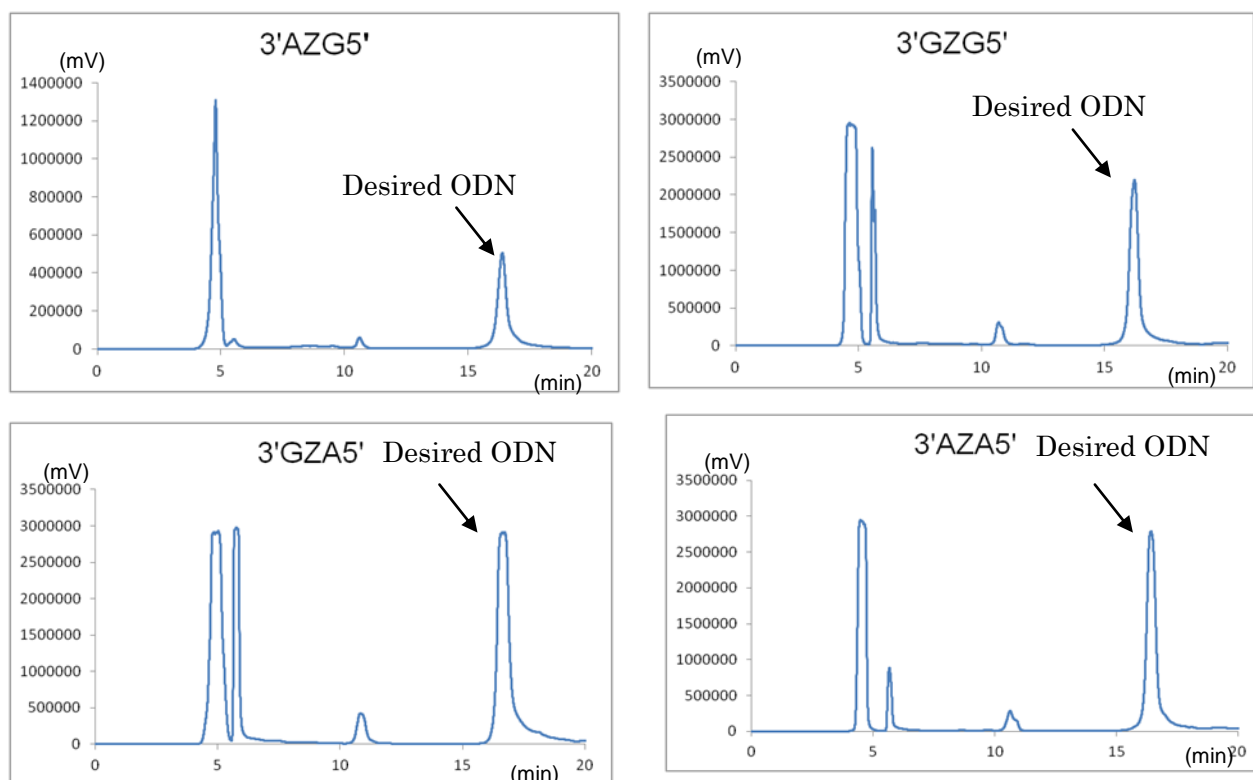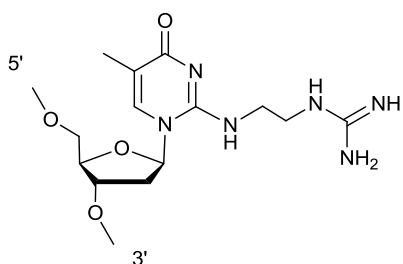

Z = et-guanidino-isodC

**HPLC conditions:**

column: Nacalai tesque COSMOSIL  
5C18-ARII, 10 x 250 mm,  
solvents: A: 0.1 M TEAA buffer, B: CH<sub>3</sub>CN, B:  
10% to 40% / 20 min, 40% to 100% / 30 min,  
Flow rate: 3.0 mL / min,  
UV: 254 nm  
Column oven: at 35°C

**Figure S1.** HPLC chart of guanidineethyl-isodC in TFO (3'-N<sup>3</sup>ZN<sup>5</sup>-5'). A suspension of the support-bound TFO in 250 μL of CH<sub>3</sub>CN was treated with 1H-pyrazole-1-carboxamide hydrochloride (1.0 mg) and DBU (50 μl) for overnight at room temperature. The support was washed two times with CH<sub>3</sub>CN, and the resulting TFO was treated with 28% aqueous ammonia for overnight at 55°C followed by HPLC purification. The major peak around 16 min was collected.

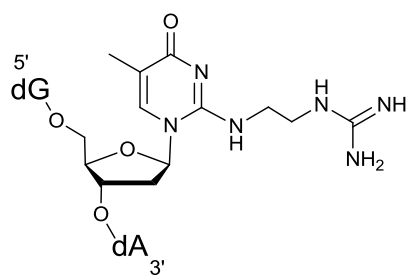

MALDI-TOF Mass (negative)  
calcd. for 5824.08  
found 5823.48

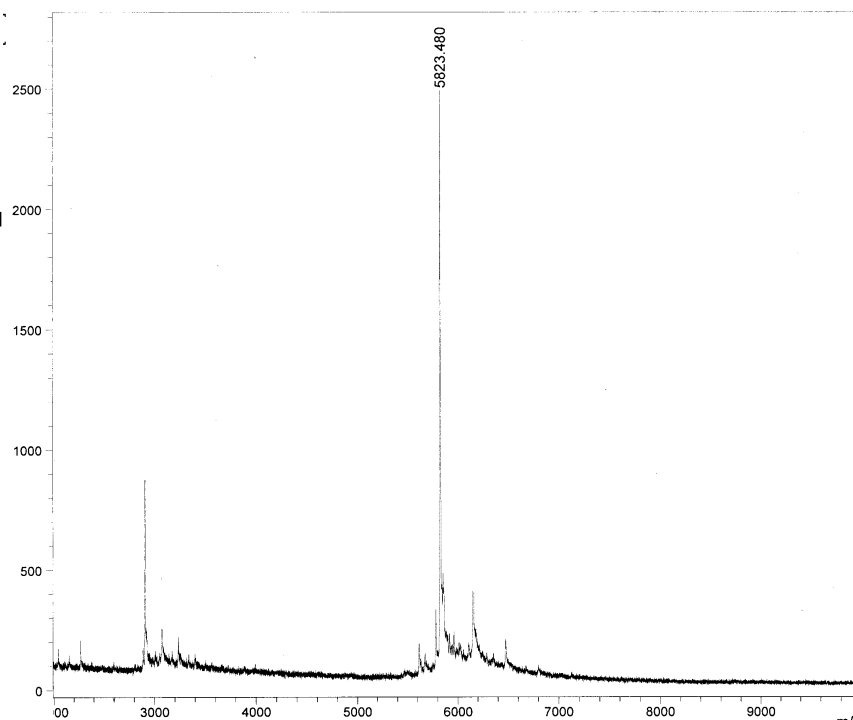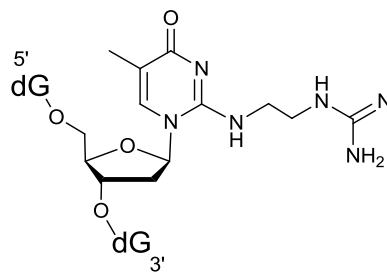

MALDI-TOF Mass (negative)  
calcd. for 5840.07  
found 5839.43

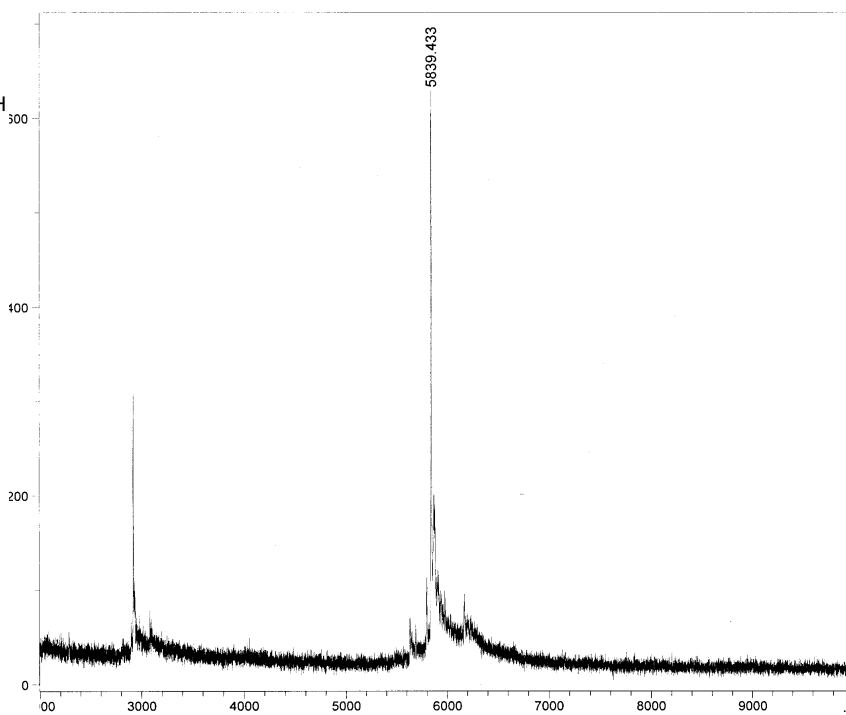

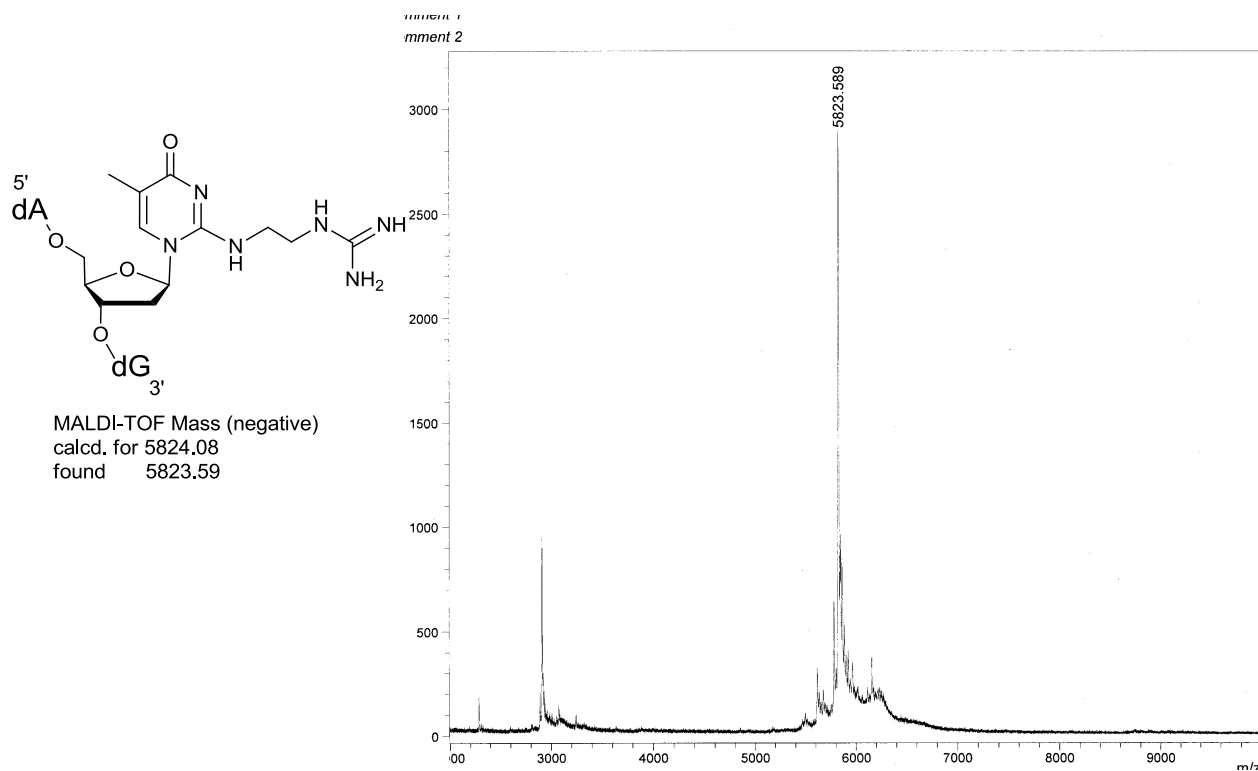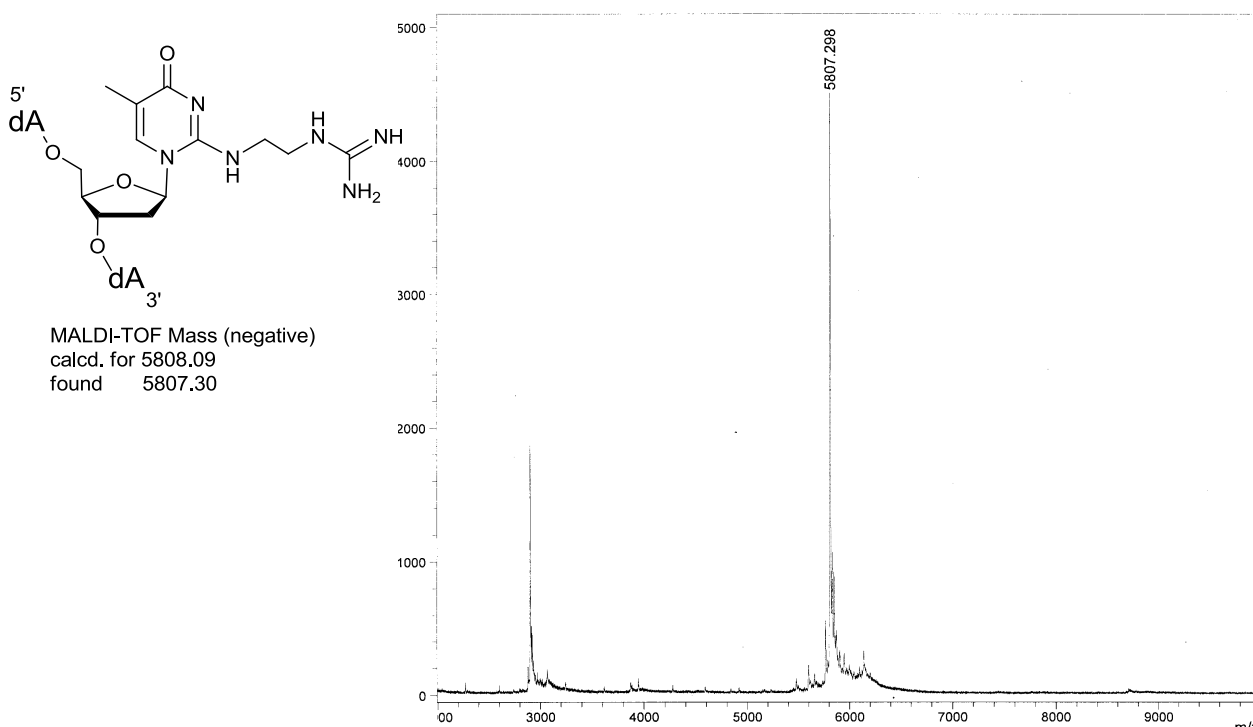

Figure S2. MALDI-TOF Mass chart of guanidineethyl-isodC in TFO (3'-N<sup>3</sup>ZN<sup>5</sup>-5').

**Table S1. MALDI-TOF mass Results of synthesized TFOs in this study (negative mode, m/z)**

| TFOs                                      | calcd. [M-H] <sup>-</sup> | found   |
|-------------------------------------------|---------------------------|---------|
| <b>TFO</b> $N^{\beta}ZN^{\delta} = A-Z-G$ |                           |         |
| <b>TFO</b> (isodC)                        | 5739.02                   | 5738.10 |
| <b>TFO</b> (et-guanidino)                 | 5824.08                   | 5823.48 |
| <b>TFO</b> (et-ureido)                    | 5825.06                   | 5823.95 |
| <b>TFO</b> (et-amino)                     | 5782.06                   | 5781.60 |
| <b>TFO</b> (propyl)                       | 5781.06                   | 5780.02 |
| <b>TFO</b> (pr-guanidino)                 | 5838.10                   | 5837.27 |
| <b>TFO</b> (pr-ureido)                    | 5839.08                   | 5838.06 |
| <b>TFO</b> (pr-amino)                     | 5796.07                   | 5795.16 |
| <b>TFO</b> $N^{\beta}ZN^{\delta} = G-Z-G$ |                           |         |
| <b>TFO</b> (isodC)                        | 5755.01                   | 5754.30 |
| <b>TFO</b> (et-guanidino)                 | 5840.07                   | 5839.43 |
| <b>TFO</b> (et-ureido)                    | 5841.05                   | 5840.67 |
| <b>TFO</b> (et-amino)                     | 5798.05                   | 5797.44 |
| <b>TFO</b> (propyl)                       | 5797.05                   | 5796.95 |
| <b>TFO</b> $N^{\beta}ZN^{\delta} = G-Z-A$ |                           |         |
| <b>TFO</b> (isodC)                        | 5739.02                   | 5738.25 |
| <b>TFO</b> (et-guanidino)                 | 5824.08                   | 5823.59 |
| <b>TFO</b> (et-ureido)                    | 5825.06                   | 5824.79 |
| <b>TFO</b> (et-amino)                     | 5782.06                   | 5781.68 |
| <b>TFO</b> (propyl)                       | 5781.06                   | 5780.00 |
| <b>TFO</b> $N^{\beta}ZN^{\delta} = A-Z-A$ |                           |         |
| <b>TFO</b> (isodC)                        | 5723.03                   | 5722.62 |
| <b>TFO</b> (et-guanidino)                 | 5808.09                   | 5807.30 |
| <b>TFO</b> (et-ureido)                    | 5809.07                   | 5808.14 |
| <b>TFO</b> (et-amino)                     | 5766.07                   | 5765.42 |
| <b>TFO</b> (propyl)                       | 5765.07                   | 5764.16 |

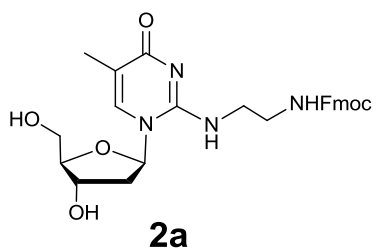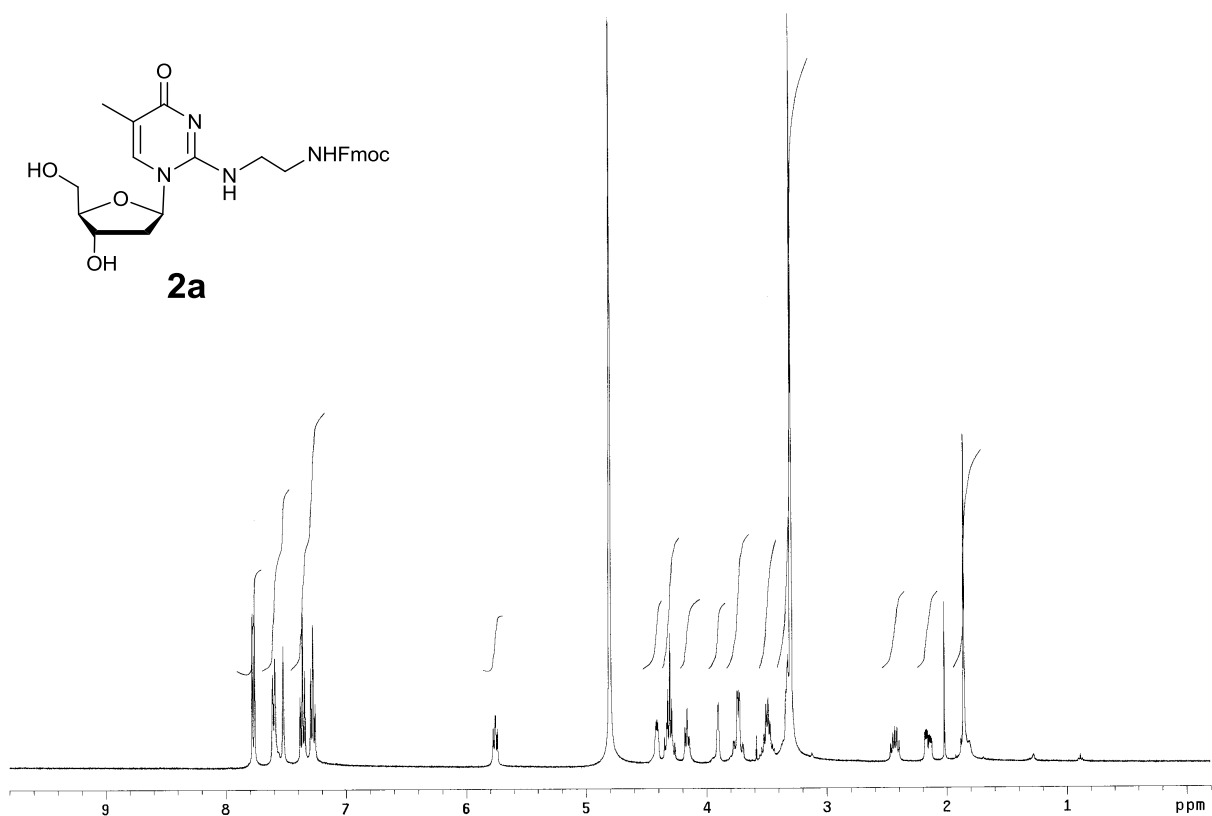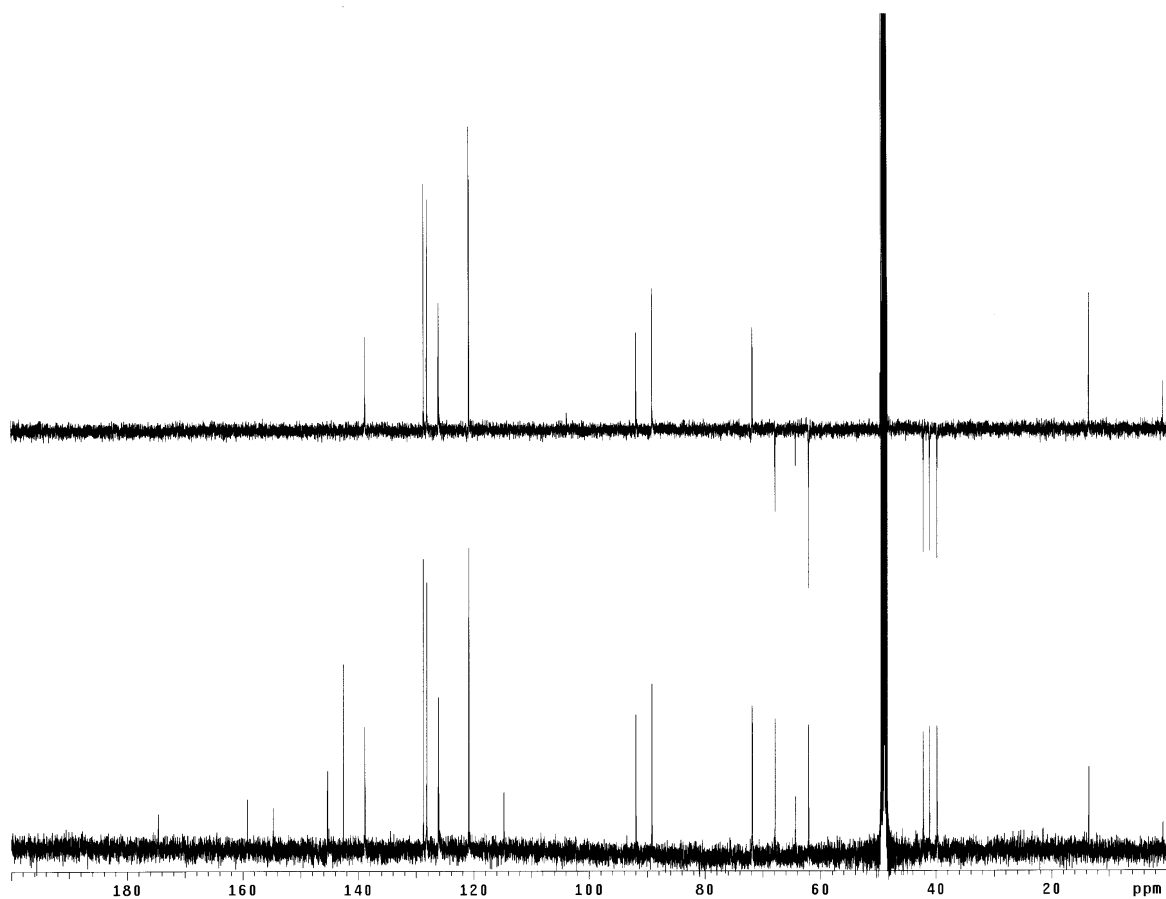

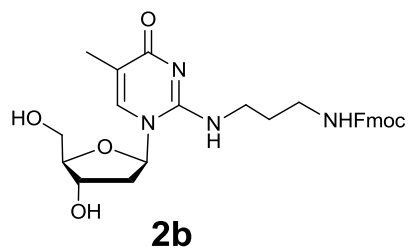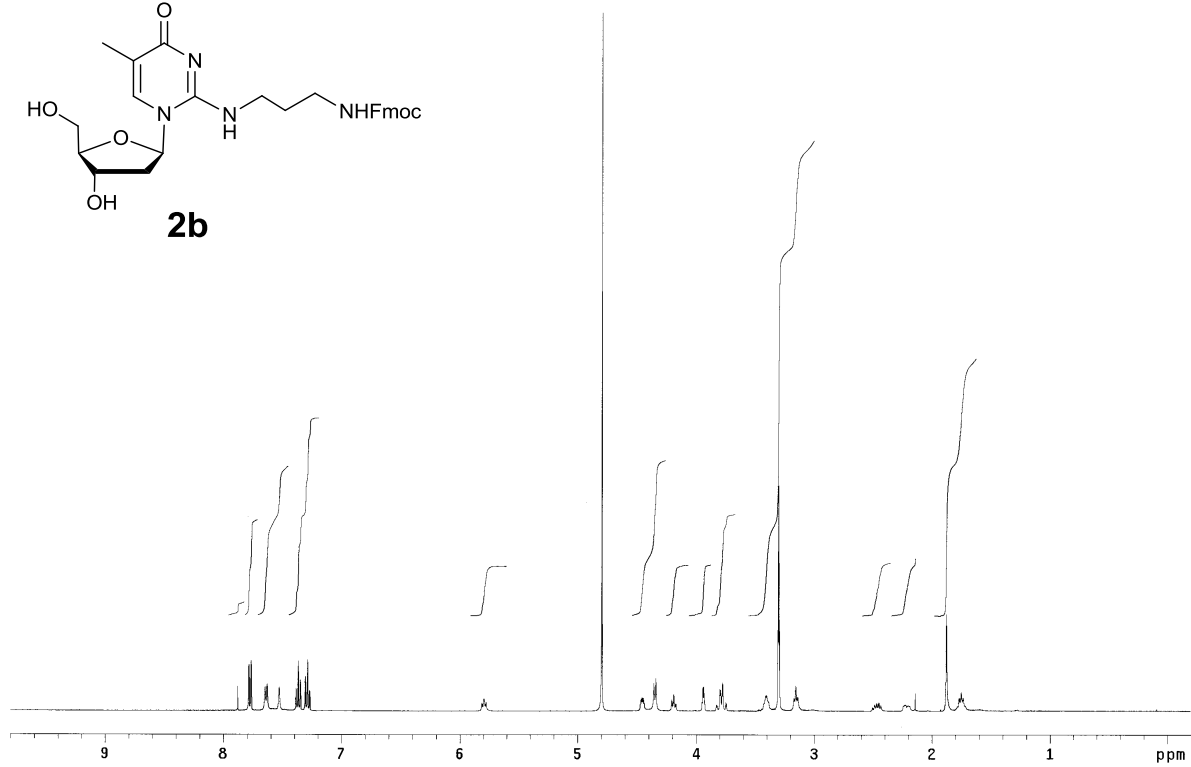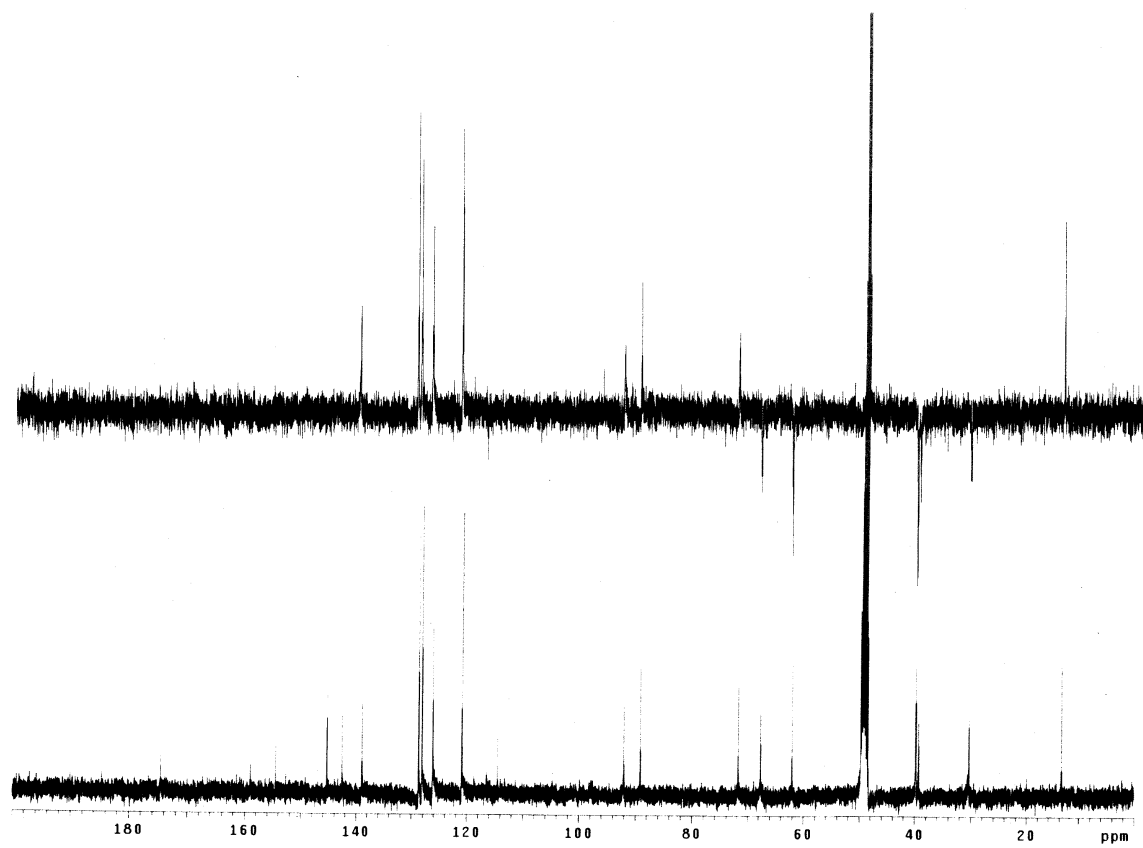

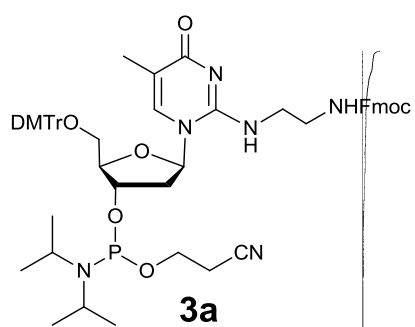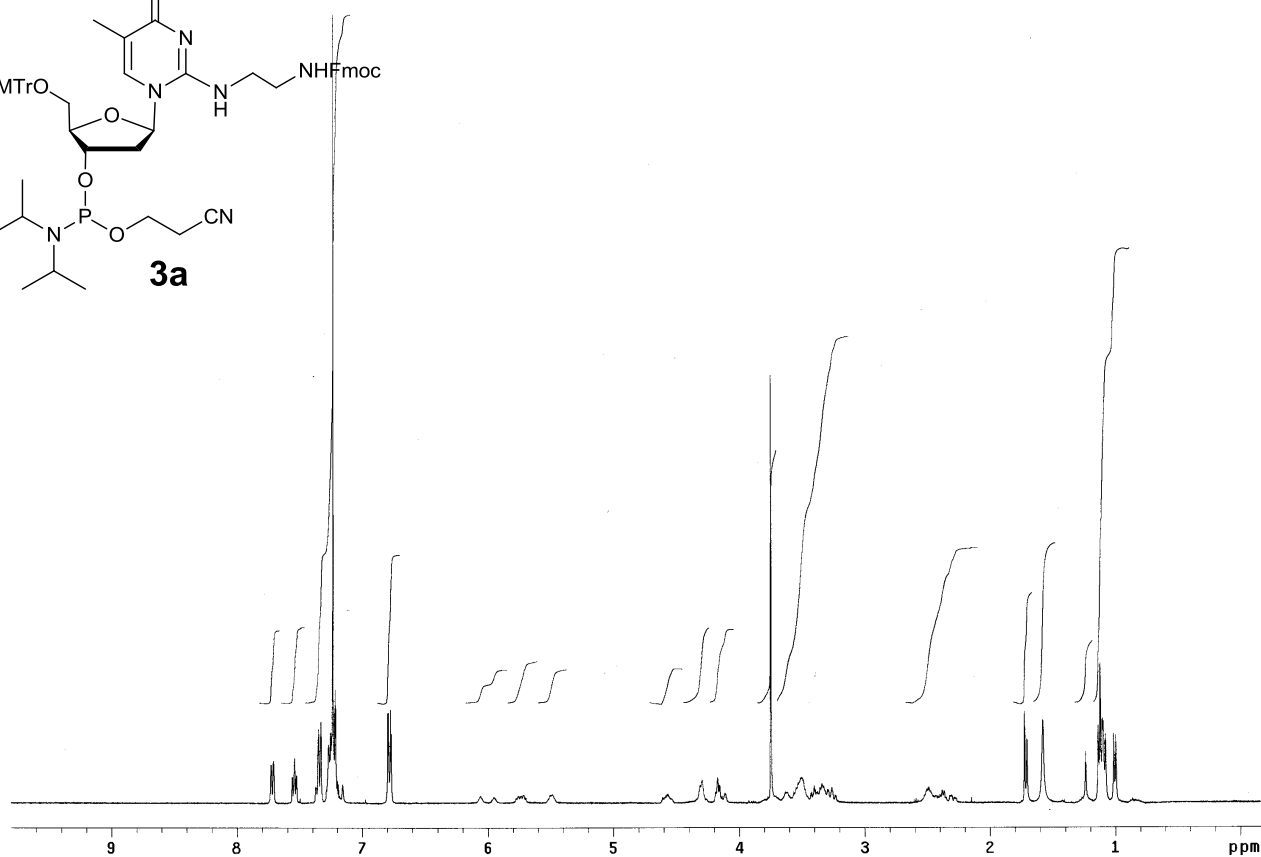

Internal standard  
(0 ppm)

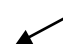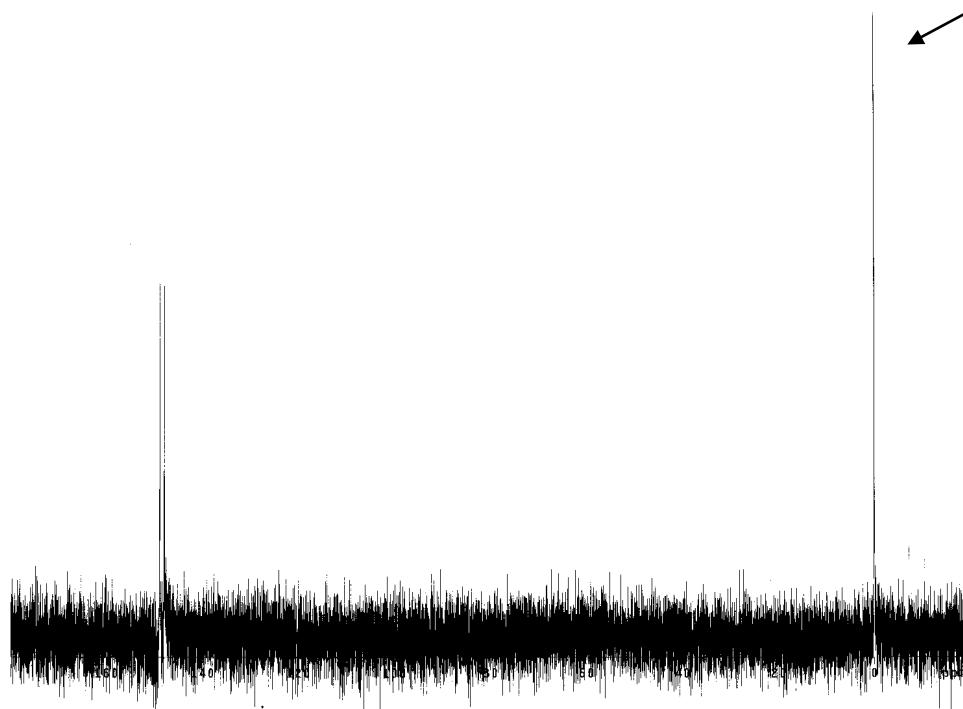



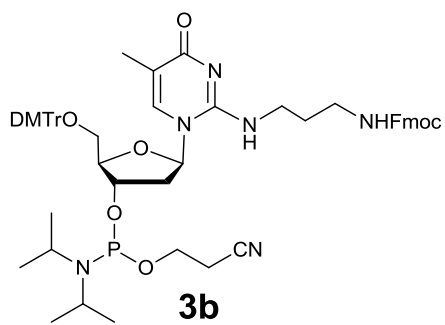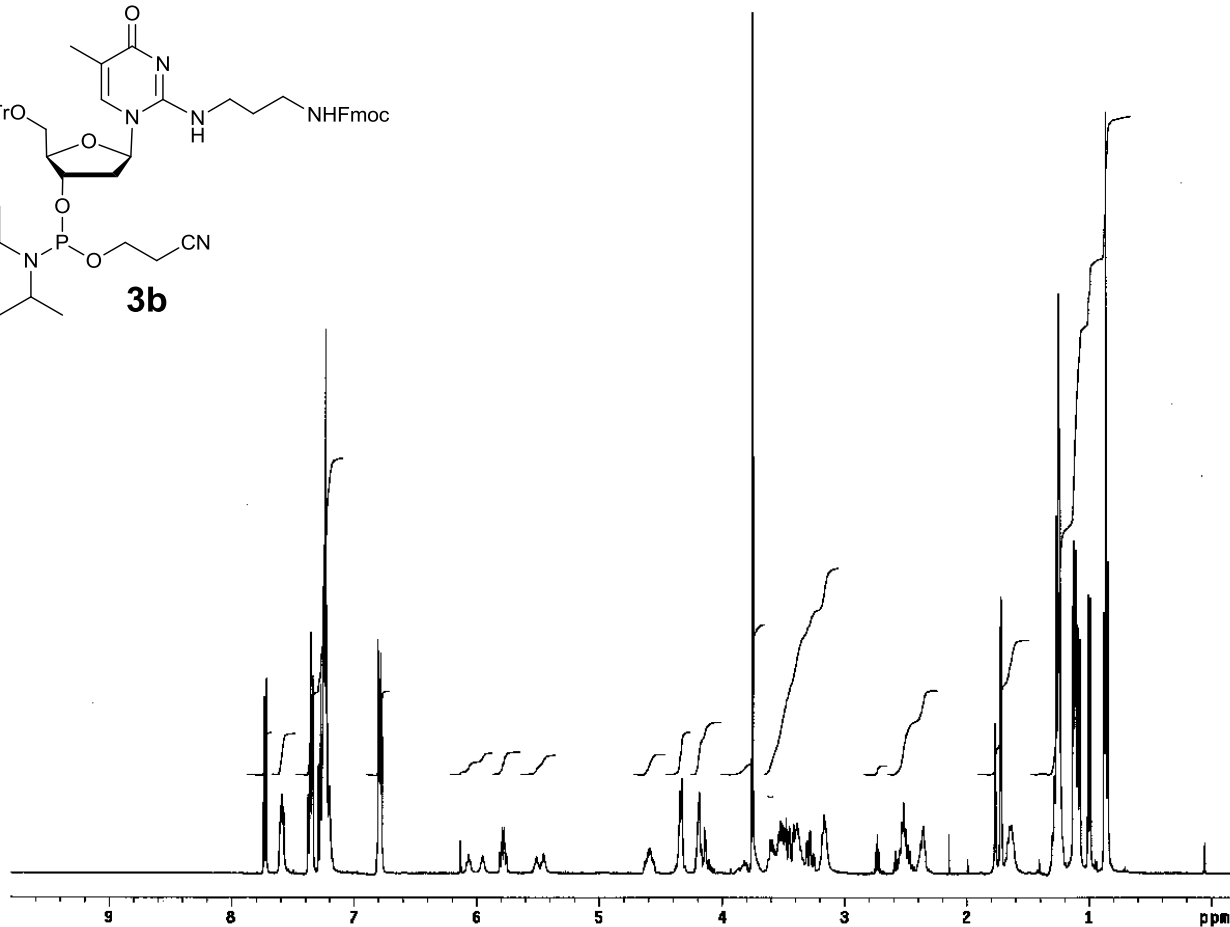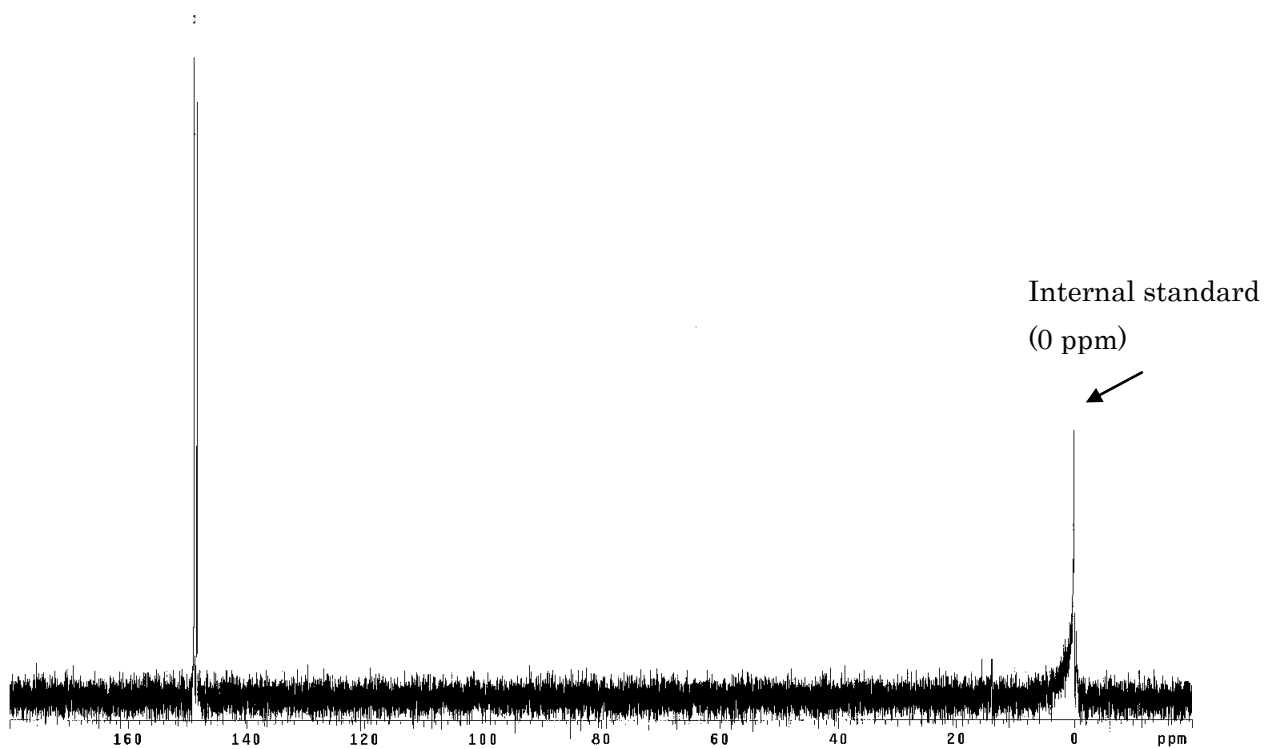

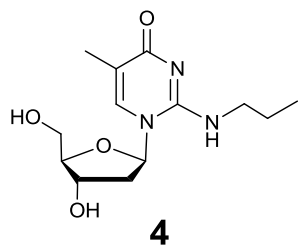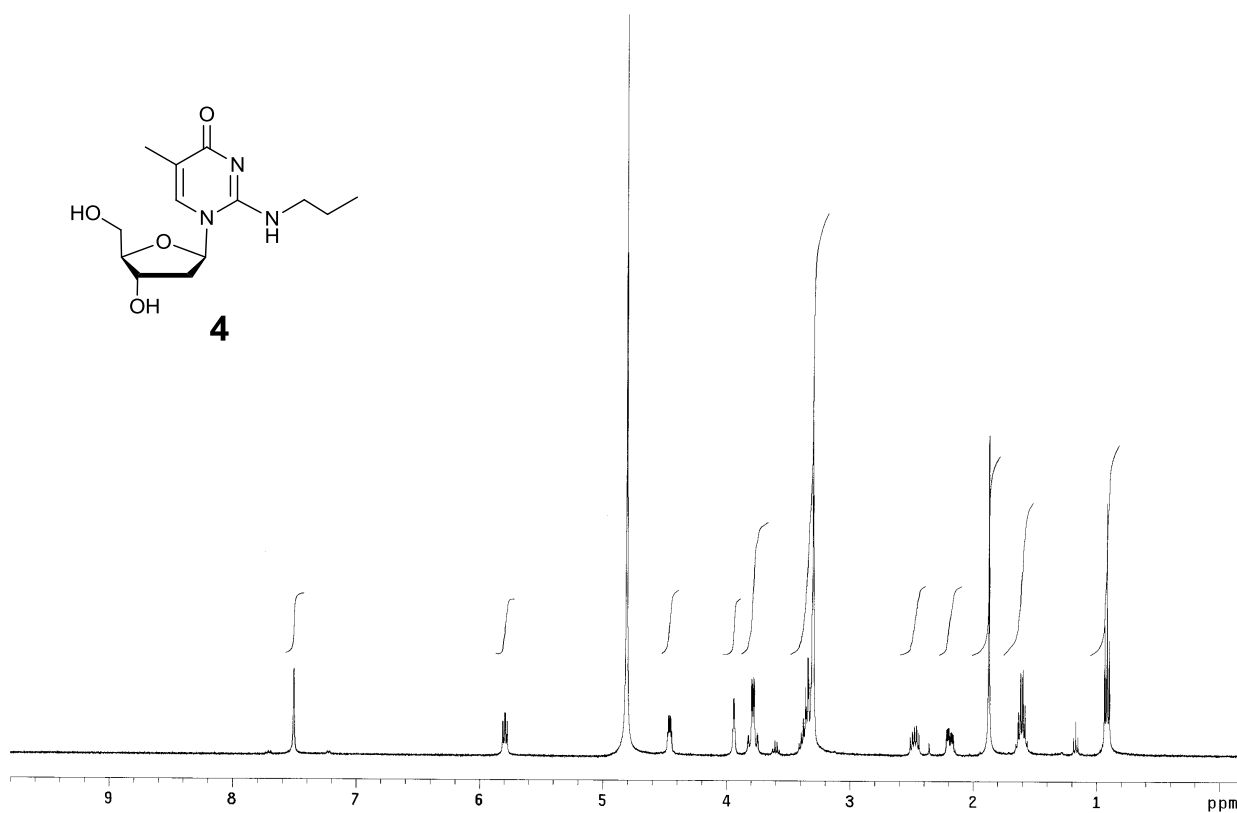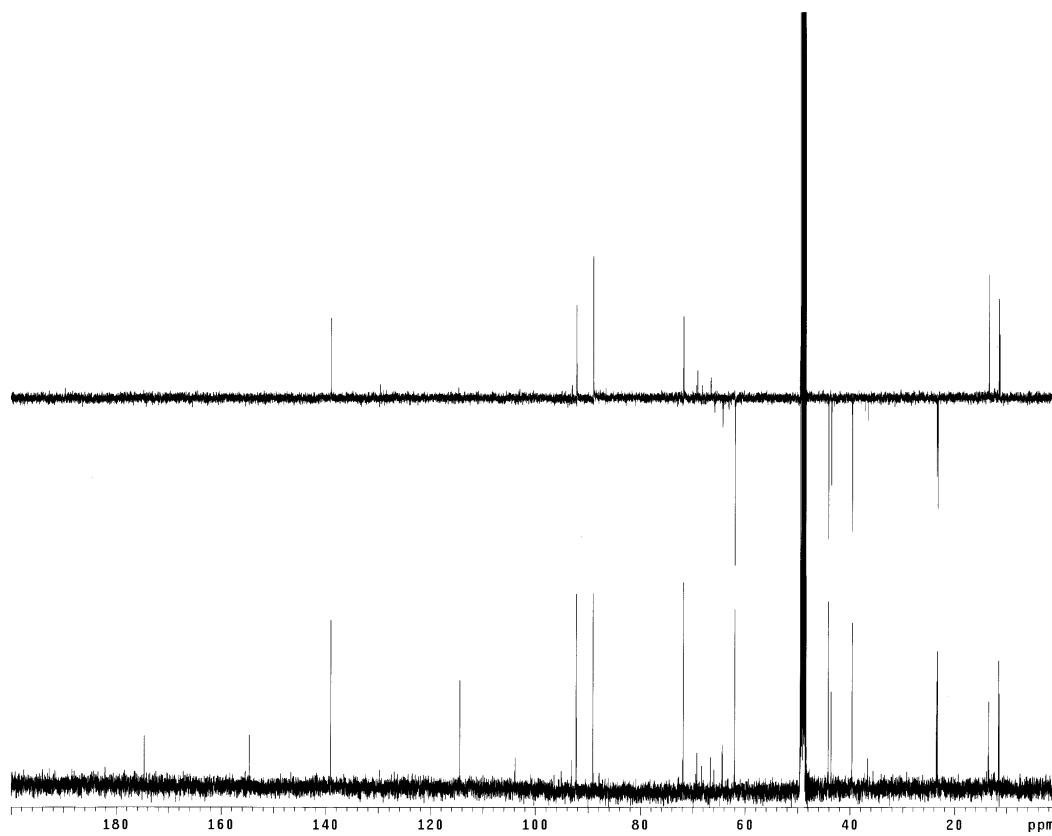

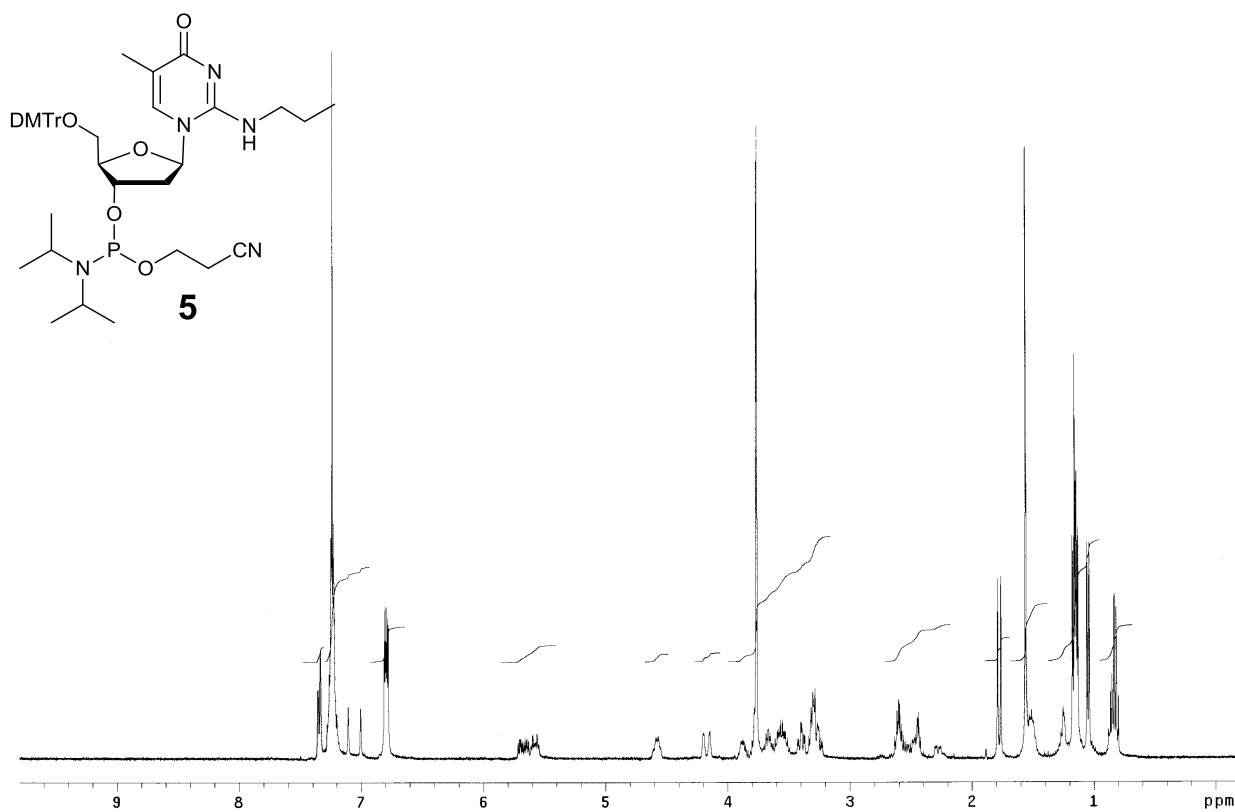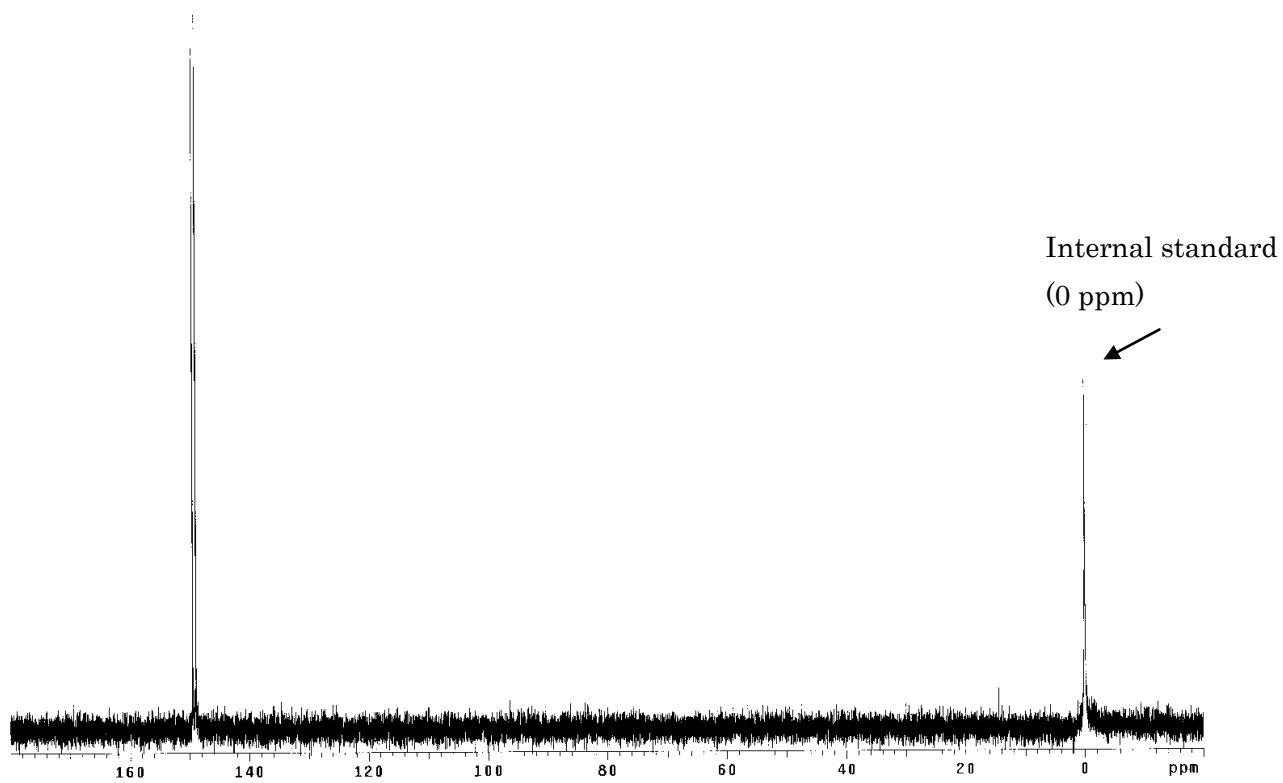

Supplement: c3ob40472b.pdf [file c3ob40472b.pdf]
